# Supplementary material for: Efficacy, Usability, and Acceptability of a Chatbot for Promoting COVID-19 Vaccination in Unvaccinated or Booster-Hesitant Young Adults: Pre-Post Pilot Study
Source: PubMed Central journal article supplement (PMC9534274; doi:10.2196/39063), 2022-10-04
Supplement: jmir_v24i10e39063_app1.pdf [file jmir_v24i10e39063_app1.pdf]

## Multimedia Appendix. COVID-19 Vaccine Hesitancy Scale

### 新冠疫苗猶豫量表

您有多同意以下有關接種新冠疫苗的說法？

(5=非常不同意; 4=不同意; 3=一半半; 2=同意; 1=非常同意)

- a. 新冠疫苗對我的健康是重要的
- b. 新冠疫苗是有效的
- c. 接種新冠疫苗對保護社區內其他人是重要的
- d. 政府新冠疫苗接種計劃所提供的新冠疫苗都是有益的
- e. 新的疫苗比舊有的疫苗帶來的風險高\*
- f. 我從新冠疫苗接種計劃獲得有關新冠疫苗的資訊都是可靠和可信的
- g. 接種新冠疫苗是保護自己免於 2019 冠狀病毒病的一個好方法
- h. 一般情況下，我會聽從醫生或醫護人員給我有關新冠疫苗的建議
- i. 我擔心新冠疫苗帶來的嚴重副作用\*

\*反向題

### COVID-19 Vaccine Hesitancy Scale

How much do you agree with the each of the following statement on COVID-19 vaccinations?

(5=strongly disagree; 4=disagree;3=neither agree nor disagree;2=agree; 1=strongly agree)

- a. COVID-19 Vaccines are important for my health
- b. COVID-19 Vaccines are effective
- c. Being vaccinated is important for the health of others in my community
- d. All COVID-19 vaccinations recommended by the government are beneficial
- e. New vaccines carry more risks than older vaccines\*
- f. The information I receive about COVID-19 vaccines from the COVID-19 Vaccination Programme is reliable and trustworthy
- g. Getting COVID-19 vaccines is a good way to protect me from COVID-19
- h. Generally, I do what my doctor or healthcare provider recommends about COVID-19 vaccines for me.
- i. I am concerned about serious adverse effects of COVID-19 vaccines\*

\*reversed items

### Adapted from the Vaccine Hesitancy Scale developed by the World Health Organization's SAGE Working Group on Vaccine Hesitancy:

Larson HJ, Jarrett C, Schulz WS, Chaudhuri M, Zhou Y, Dube E, Schuster M, MacDonald NE, Wilson R; SAGE Working Group on Vaccine Hesitancy. Measuring vaccine hesitancy: The development of a survey tool. *Vaccine*. 2015 Aug 14;33(34):4165-75.

Shapiro GK, Tatar O, Dube E, Amsel R, Knauper B, Naz A, Perez S, Rosberger Z. The vaccine hesitancy scale: Psychometric properties and validation. *Vaccine*. 2018 Jan 29;36(5):660-667.
